# Supplementary material for: Systems chemo-biology analysis of DNA damage response and cell cycle effects induced by coal exposure
Source: PubMed Central journal article supplement (PMC7315349; doi:10.1590/1678-4685-gmb-2019-0134), 2020-06-26

## Supplementary Material to “Systems chemo-biology analysis of DNA damage response and cell cycle effects induced by coal exposure”

**Figure S1** - Coal sample collection sites in Colombia: ‘El Cerrejón’ (La Guajira, Colombia) and ‘Guacamaya’ (Puerto Libertador, Córdoba, Colombia) coal mines

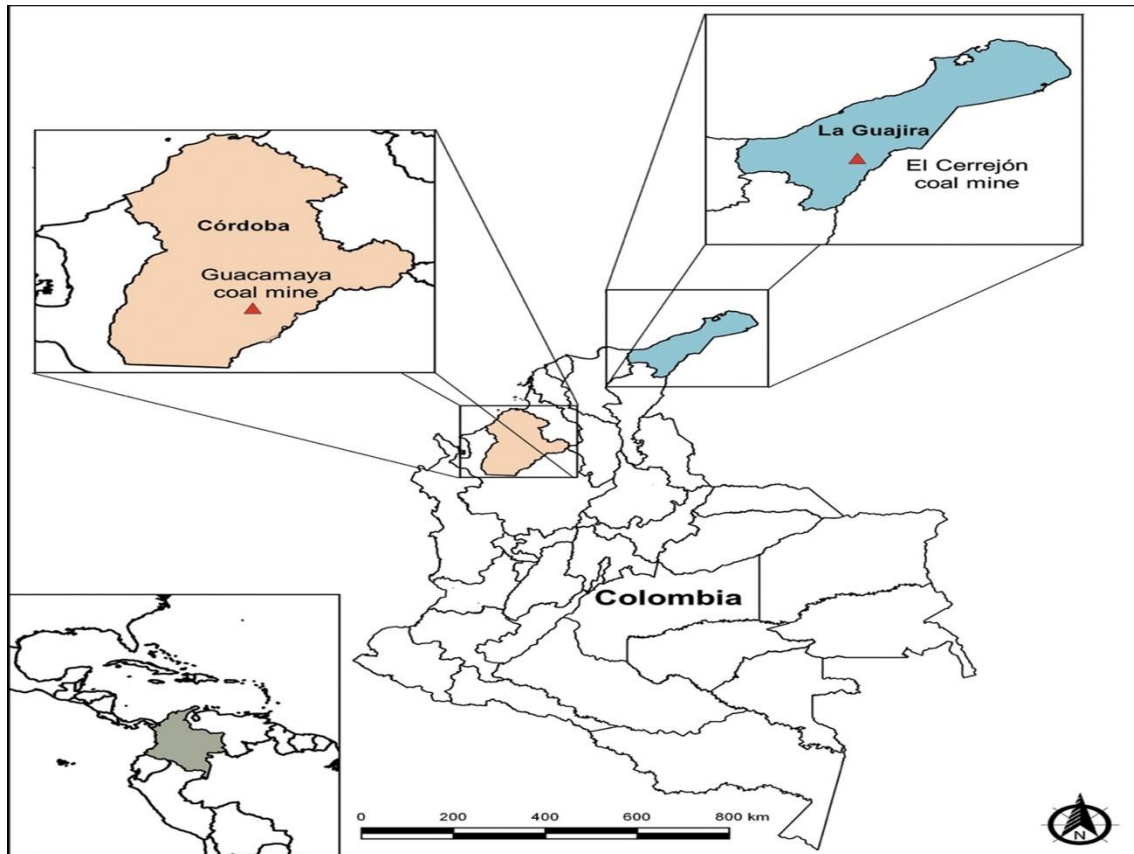

Supplement: 1415-4757-GMB-43-3-e20190134-suppl1.pdf [file 1415-4757-GMB-43-3-e20190134-suppl1.pdf]
