# Supplementary material for: Systems chemo-biology analysis of DNA damage response and cell cycle effects induced by coal exposure
Source: PubMed Central journal article supplement (PMC7315349; doi:10.1590/1678-4685-gmb-2019-0134), 2020-06-26
Supplement: 1415-4757-GMB-43-3-e20190134-suppl3.pdf [file 1415-4757-GMB-43-3-e20190134-suppl3.pdf]

## Supplementary Material to “Systems chemo-biology analysis of DNA damage response and cell cycle effects induced by coal exposure”

**Table S1** - Major inorganic oxide components in coal ashes (% wt) as identified by XRF

| Elements                       | Guacamaya (%) | El Cerrejon (%) |
|--------------------------------|---------------|-----------------|
| SiO <sub>2</sub>               | 13.01         | 62.21           |
| TiO <sub>2</sub>               | 0.33          | 0.92            |
| Al <sub>2</sub> O <sub>3</sub> | 7.52          | 19.62           |
| Fe <sub>2</sub> O <sub>3</sub> | 9.7           | 8.42            |
| MgO                            | 13.66         | 2.01            |
| CaO                            | 29.64         | 1.62            |
| Na <sub>2</sub> O              | 10.58         | 1.11            |
| K <sub>2</sub> O               | 0.44          | 2.17            |
| P <sub>2</sub> O <sub>5</sub>  | 0.04          | 0.17            |
| SO <sub>3</sub>                | 15.08         | 1.75            |

%wt: percentage by weight
