# Supplementary material for: Systems chemo-biology analysis of DNA damage response and cell cycle effects induced by coal exposure
Source: PubMed Central journal article supplement (PMC7315349; doi:10.1590/1678-4685-gmb-2019-0134), 2020-06-26
Supplement: 1415-4757-GMB-43-3-e20190134-suppl4.pdf [file 1415-4757-GMB-43-3-e20190134-suppl4.pdf]

## Supplementary Material to “Systems chemo-biology analysis of DNA damage response and cell cycle effects induced by coal exposure”

**Table S2** - Inorganic element concentrations in coal samples as revealed by PIXE assay (mean  $\pm$  standard deviation)

| Inorganic elements | Guacamaya (PPM)                                      | El Cerrejón (PPM)                                      |
|--------------------|------------------------------------------------------|--------------------------------------------------------|
| Sodium (Na)        | <b>9212 <math>\pm</math> 1050.73<sup>***</sup></b>   | 3283 $\pm$ 285.97                                      |
| Magnesium (Mg)     | <b>4779.33 <math>\pm</math> 332.27<sup>***</sup></b> | 2166.33 $\pm$ 167.63                                   |
| Aluminium (Al)     | 1634.33 $\pm$ 75.22                                  | <b>21311 <math>\pm</math> 2110.55<sup>***</sup></b>    |
| Silicon (Si)       | 1341.67 $\pm$ 91.09                                  | <b>37252.33 <math>\pm</math> 3907.90<sup>***</sup></b> |
| Sulphur (S)        | 4084 $\pm$ 312.64                                    | <b>6807.67 <math>\pm</math> 239.43<sup>***</sup></b>   |
| Chlorine (Cl)      | 52.94 $\pm$ 10.28                                    | <b>243.77 <math>\pm</math> 40.05<sup>**</sup></b>      |
| Potassium (K)      | 137.33 $\pm$ 2.76                                    | <b>1873.33 <math>\pm</math> 180.79<sup>***</sup></b>   |
| Calcium (Ca)       | <b>7838 <math>\pm</math> 241.01<sup>***</sup></b>    | 1675 $\pm$ 595.25                                      |
| Titanium (Ti)      | 115.37 $\pm$ 14.79                                   | <b>879.97 <math>\pm</math> 241.27<sup>**</sup></b>     |
| Chromium (Cr)      | 4.638 $\pm$ 3.591                                    | 20.98 $\pm$ 0.97                                       |
| Manganese (Mn)     | 9.56 $\pm$ 1.38                                      | <b>85.46 <math>\pm</math> 18.21<sup>*</sup></b>        |
| Iron (Fe)          | 3078.67 $\pm$ 76.63                                  | <b>6113.33 <math>\pm</math> 1399.06<sup>*</sup></b>    |
| Nickel (Ni)        | 17.61 $\pm$ 21.44                                    | 241.77 $\pm$ 163.14                                    |
| Zinc (Zn)          | 12.40 $\pm$ 1.71                                     | <b>31.63 <math>\pm</math> 6.89<sup>*</sup></b>         |
| Strontium (Sr)     | 180.7 $\pm$ 8.54                                     | ND                                                     |

Unpaired T Test/ **Bold** for significantly higher values \*\*\*P < 0.001, \*\*P < 0.01, \*P < 0.05

ND = Not detected
