# Supplementary material for: Systems chemo-biology analysis of DNA damage response and cell cycle effects induced by coal exposure
Source: PubMed Central journal article supplement (PMC7315349; doi:10.1590/1678-4685-gmb-2019-0134), 2020-06-26
Supplement: 1415-4757-GMB-43-3-e20190134-suppl5.pdf [file 1415-4757-GMB-43-3-e20190134-suppl5.pdf]

## Supplementary Material to “Systems chemo-biology analysis of DNA damage response and cell cycle effects induced by coal exposure”

**Table S3** - Polycyclic aromatic hydrocarbon concentrations per sample (mean  $\pm$  standard deviation) as revealed by

| HPLC/UV/Vis             |                                        |                                          |
|-------------------------|----------------------------------------|------------------------------------------|
| PAH                     | Guacamaya<br>( $\mu\text{g.kg}^{-1}$ ) | El Cerrejón<br>( $\mu\text{g.kg}^{-1}$ ) |
| Naphthalene             | 465 $\pm$ 16.34                        | 864.1 $\pm$ 90.88                        |
| Acenaphthene            | 2.4 $\pm$ 0.03                         | 3.8 $\pm$ 0.89                           |
| Phenanthrene            | 386.6 $\pm$ 1.46                       | 846.2 $\pm$ 47.75                        |
| Anthracene              | 309.9 $\pm$ 13.37                      | 1285.1 $\pm$ 110.57                      |
| Fluoranthene            | 1159.9 $\pm$ 59.17                     | 1437.5 $\pm$ 245.52                      |
| Benzo[a]anthracene      | 676.5 $\pm$ 38.95                      | 5045.4 $\pm$ 413.45                      |
| Benzo[g,h,i]pyrene      | 0.91 $\pm$ 7.60                        | 1.3 $\pm$ 3.56                           |
| Benzo[b]fluoranthene    | 0.06 $\pm$ 0.02                        | 0.6 $\pm$ 0.04                           |
| Dibenzo[a, h]anthracene | 13.2 $\pm$ 0.001                       | 28.9 $\pm$ 3.85                          |
| Indeno[1,2,3-cd]pyrene  | 9.5 $\pm$ 0.006                        | 12.3 $\pm$ 0.005                         |
| Benzo[k]fluoranthene    | 0.9 $\pm$ 0.06                         | 30.8 $\pm$ 1.10                          |
