# Supplementary material for: Systems chemo-biology analysis of DNA damage response and cell cycle effects induced by coal exposure
Source: PubMed Central journal article supplement (PMC7315349; doi:10.1590/1678-4685-gmb-2019-0134), 2020-06-26
Supplement: 1415-4757-GMB-43-3-e20190134-suppl6.pdf [file 1415-4757-GMB-43-3-e20190134-suppl6.pdf]

## Supplementary Material to “Systems chemo-biology analysis of dna damage response and cell cycle effects induced by coal exposure”

**Table S4.** Proteins involved in hub-bottlenecks (HBs) and their function.

| Protein name | Description <sup>a</sup>                                                         | Function <sup>a</sup>                                                                                 |
|--------------|----------------------------------------------------------------------------------|-------------------------------------------------------------------------------------------------------|
| UBC          | Ubiquitin C                                                                      | protease binding                                                                                      |
| UBA52        | Ubiquitin A-52 Residue Ribosomal Protein Fusion Product 1                        | structural constituent of ribosome                                                                    |
| RPS27A       | Ribosomal Protein S27a                                                           | structural constituent of ribosome                                                                    |
| HSP90AA1     | Heat Shock Protein 90 Alpha Family Class A Member 1                              | identical protein binding                                                                             |
| CAD          | Carbamoyl-Phosphate Synthetase 2, Aspartate Transcarbamylase, And Dihydroorotase | protein binding and enzyme binding                                                                    |
| SRC          | SRC Proto-Oncogene, Non-Receptor Tyrosine Kinase                                 | transferase activity, transferring phosphorus-containing groups and protein tyrosine kinase activity. |
| JUN          | Jun Proto-Oncogene, AP-1 Transcription Factor Subunit                            | sequence-specific DNA binding                                                                         |
| MAPK14       | Mitogen-Activated Protein Kinase 14                                              | transferase activity, transferring phosphorus-containing groups and protein tyrosine kinase activity  |
| APP          | Amyloid Beta Precursor Protein                                                   | protein binding and enzyme binding.                                                                   |
| CREBBP       | CREB Binding Protein                                                             | DNA-binding transcription factor activity and transcription factor binding                            |
| AKT1         | AKT Serine/Threonine Kinase 1                                                    | protein binding and protein kinase activity                                                           |

<sup>a</sup>The protein descriptions and functions were obtained from the GeneCards website [<http://www.genecards.org>].
